# Supplementary material for: 10-hydroxy-2E-decenoic acid (10HDA) does not promote caste differentiation in Melipona scutellaris stingless bees
Source: PubMed Central journal article supplement (PMC8110752; doi:10.1038/s41598-021-89212-5), 2021-05-10
Supplement: 41598_2021_89212_MOESM7_ESM.pdf [file 41598_2021_89212_MOESM7_ESM.pdf]

**10-hydroxy-2E-decenoic acid (10HDA) does not promote caste differentiation in *Melipona scutellaris* stingless bees**

Luiza Diniz Ferreira Borges<sup>1\*</sup>, Letícia Leandro Batista<sup>1</sup>, Serena Mares Malta<sup>1</sup>, Tamiris Sabrina Rodrigues<sup>1</sup>, Jéssica Regina da Costa Silva<sup>1</sup>, Gabriela Venturini<sup>2</sup>, Alexandre da Costa Pereira<sup>2</sup>, Pedro Henrique Gonçalves Guedes<sup>1</sup>, Carlos Ueira-Vieira<sup>1</sup>, Ana Maria Bonetti<sup>1\*</sup>

**Supplementary Table S7: *Melipona scutellaris* developmental stages.** The classification of developmental stages followed previously described parameters [53,72].

| <b>Stage</b> | <b>Classification</b>                                                                                                                                                                                          |
|--------------|----------------------------------------------------------------------------------------------------------------------------------------------------------------------------------------------------------------|
| L1           | 1 <sup>st</sup> instar larva                                                                                                                                                                                   |
| L2           | 2 <sup>nd</sup> instar larva                                                                                                                                                                                   |
| L3.1         | 3 <sup>rd</sup> instar larva: large quantity of liquid food; larvae with curved body and of pearly color                                                                                                       |
| L3.2         | 3 <sup>rd</sup> instar larval: slightly less food of more viscous consistency; the larvae continue curved and of pearly color                                                                                  |
| L3.3         | 3 <sup>rd</sup> instar larva: little food of solid consistency left in the brood cells; the larvae are of bright pearly color                                                                                  |
| LPD          | 3 <sup>rd</sup> instar pre-defecating larva: brood cells without food; the defecation process has not yet started; the larvae are slightly bent with head pointing upward and still are of bright pearly color |
| LD           | 3 <sup>rd</sup> instar defecating larva: brood combs without food; the larvae started to void the gut; they are straight with the head pointing toward upward; color is now whitish                            |
| Pw           | White-eyed pupa                                                                                                                                                                                                |
| Pp           | Pink-eyed pupa                                                                                                                                                                                                 |
| Pb           | Brown-eyed pupa with unpigmented body                                                                                                                                                                          |
| Pbl          | Brown-eyed pupa with lightly-pigmented body                                                                                                                                                                    |
| Pbd          | Brown-eyed pupa with dark-pigmented body                                                                                                                                                                       |
| NE           | Newly-emerged adult                                                                                                                                                                                            |
