# Supplementary material for: 10-hydroxy-2E-decenoic acid (10HDA) does not promote caste differentiation in Melipona scutellaris stingless bees
Source: PubMed Central journal article supplement (PMC8110752; doi:10.1038/s41598-021-89212-5), 2021-05-10

**10-hydroxy-2E-decenoic acid (10HDA) does not promote caste differentiation in *Melipona scutellaris* stingless bees**

Luiza Diniz Ferreira Borges<sup>1\*</sup>, Letícia Leandro Batista<sup>1</sup>, Serena Mares Malta<sup>1</sup>, Tamiris Sabrina Rodrigues<sup>1</sup>, Jéssica Regina da Costa Silva<sup>1</sup>, Gabriela Venturini<sup>2</sup>, Alexandre da Costa Pereira<sup>2</sup>, Pedro Henrique Gonçalves Guedes<sup>1</sup>, Carlos Ueira-Vieira<sup>1</sup>, Ana Maria Bonetti<sup>1\*</sup>

**Supplementary Figure S1: Significance Analysis of Microarrays (SAM) of metabolites of *Melipona scutellaris* larvae.** SAM shows 45 significant metabolites tentatively identified in the larvae. These are presented in Supplementary Table S2. FDR = false discovery rate.

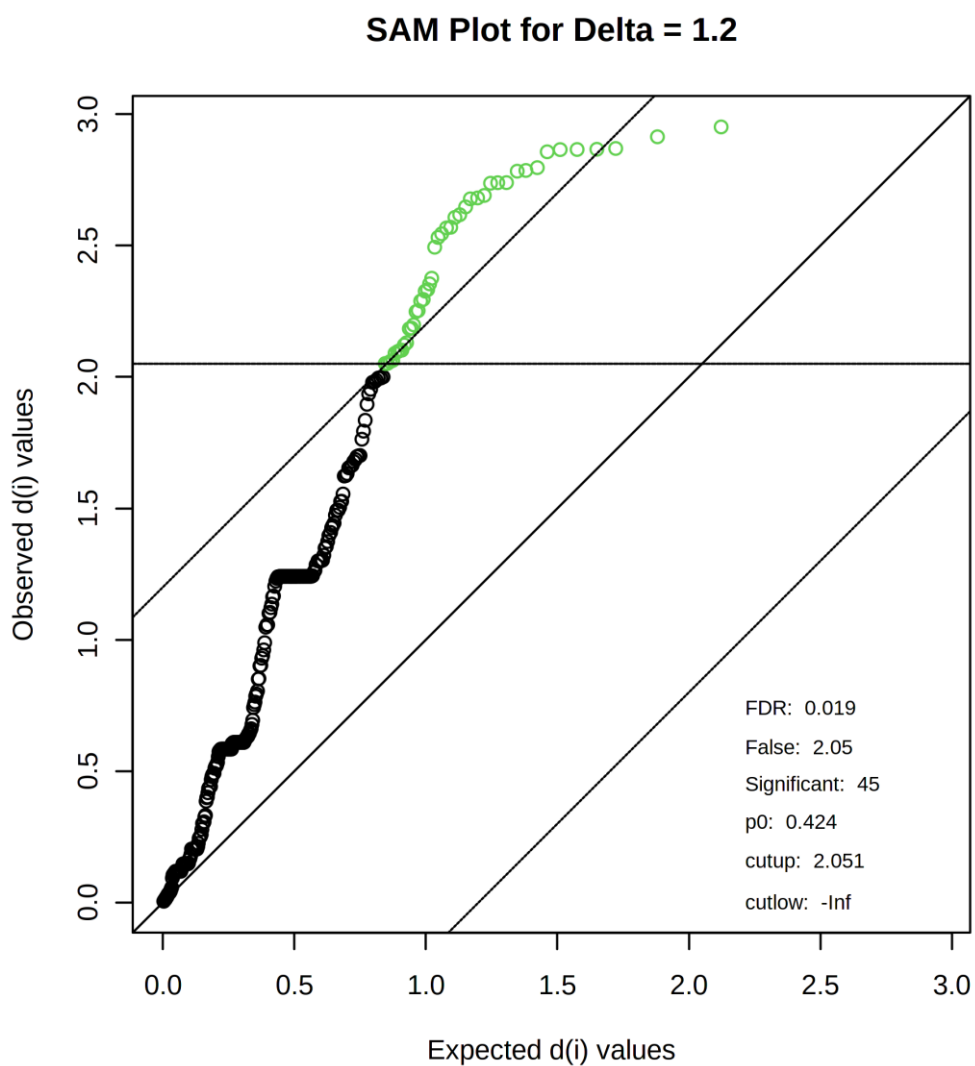

**Supplementary Figure S2: Metabolites of *Melipona scutellaris* larval food.**

Venn diagram of shared metabolites between larval food samples.

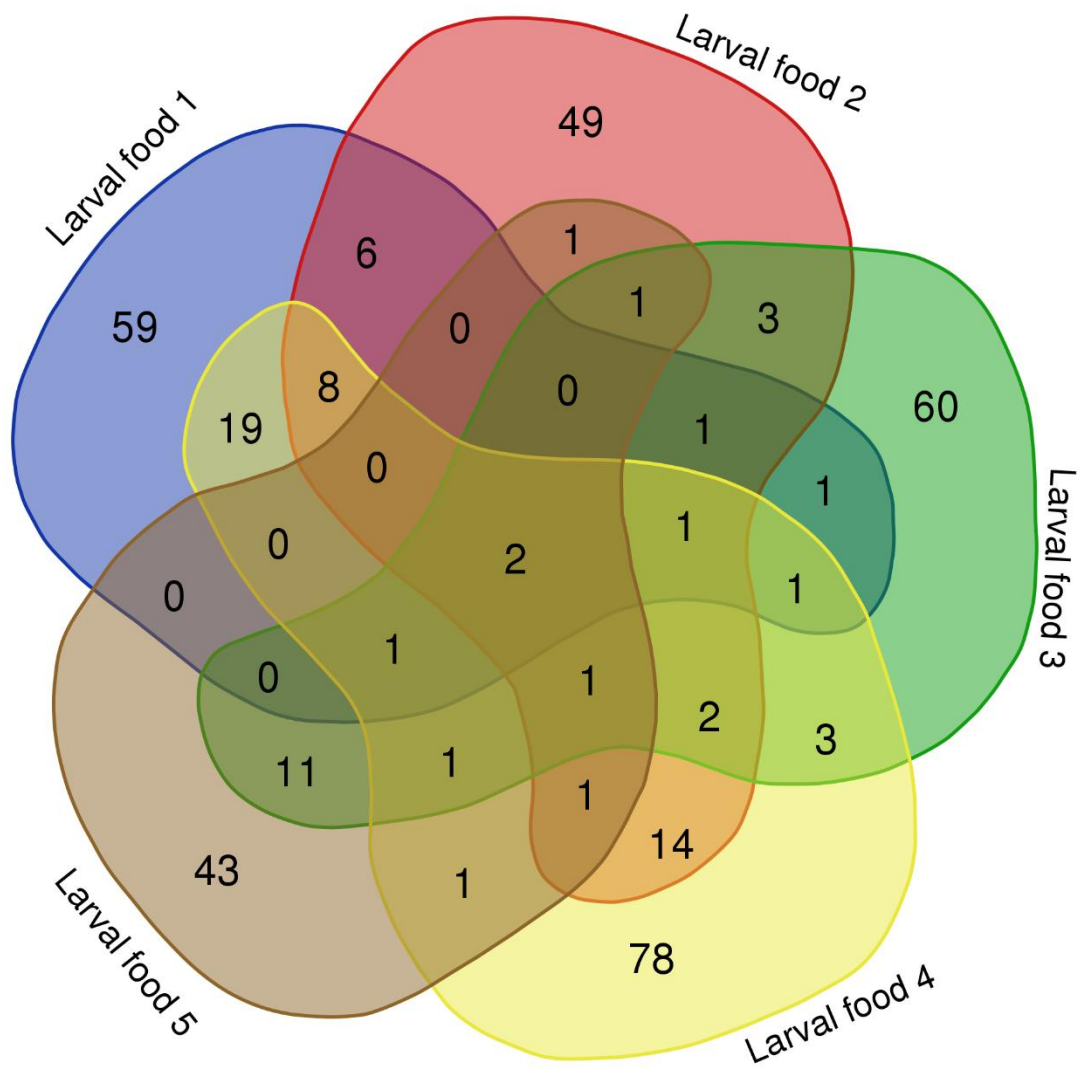

Supplement: 41598_2021_89212_MOESM8_ESM.pdf [file 41598_2021_89212_MOESM8_ESM.pdf]
